# Supplementary material for: A Self-Powered Biosensor for Monitoring Maximal Lactate Steady State in Sport Training
Source: MDPI journal article supplement (doi:10.3390/bios10070075), 2020-07-08
Supplement: s1 [file s1]

Article

# A Self-Powered Biosensor for Monitoring Maximal Lactate Steady State in Sport Training

Yupeng Mao <sup>1,†</sup>, Wen Yue <sup>2,†</sup>, Tianming Zhao <sup>3</sup>, MaiLun Shen <sup>1</sup>, Bing Liu <sup>4</sup> and Song Chen <sup>1,\*</sup>

<sup>1</sup> Physical Education Department, Northeastern University, Shenyang 110819, China; maoyupeng@pe.neu.edu.cn (Y.M.); sml1995@163.com (M.S.)

<sup>2</sup> Department of Physical Education, Beihang University, Beijing 100191, China; sqxs9@buaa.edu.cn

<sup>3</sup> College of Sciences, Northeastern University, Shenyang 110819, China; zhaotm@stumail.neu.edu.cn

<sup>4</sup> School of Arts, Beijing Sport University, Beijing 100084, China; bingliu067@163.com

\* Correspondence: chensong@pe.neu.edu.cn

† These two authors contributed equally to this work.

Received: 3 June 2020; Accepted: 3 July 2020; Published: 8 July 2020

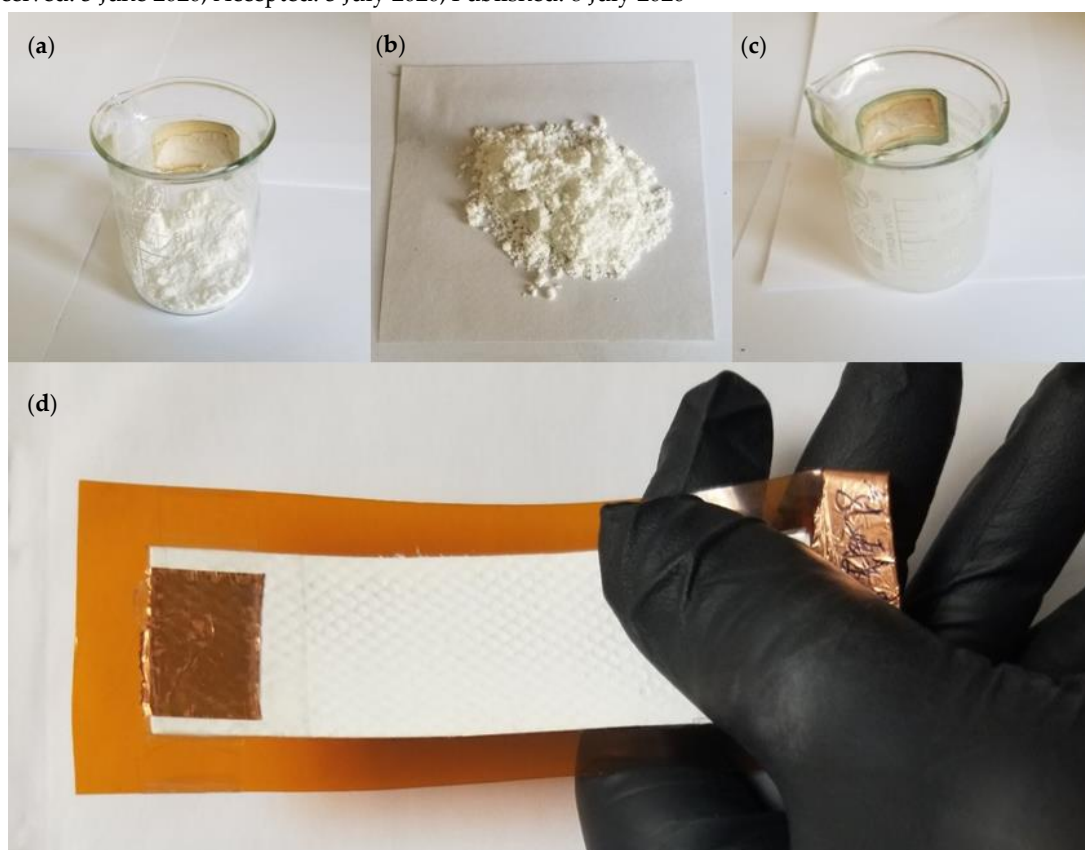

**Figure S1.** Optical photographs of self-powered biosensor. (a) PVDF (b) T-ZnO (c) T-ZnO/PVDF paste (d) self-powered device.

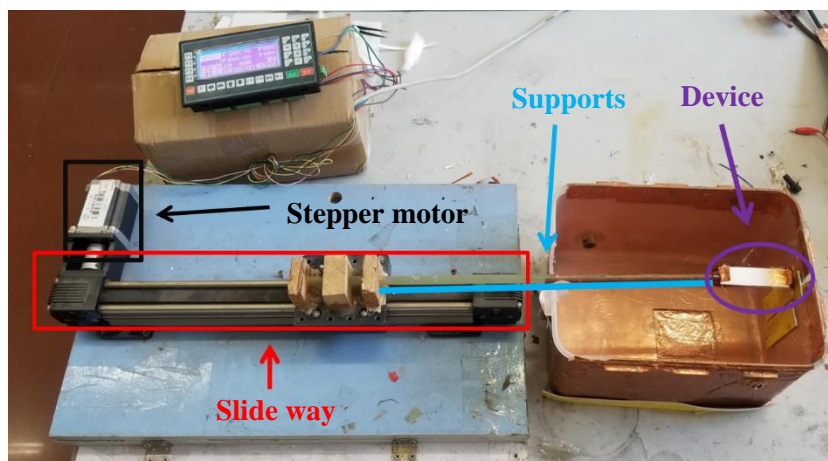

Figure S2. Optical photograph of the measurement system.

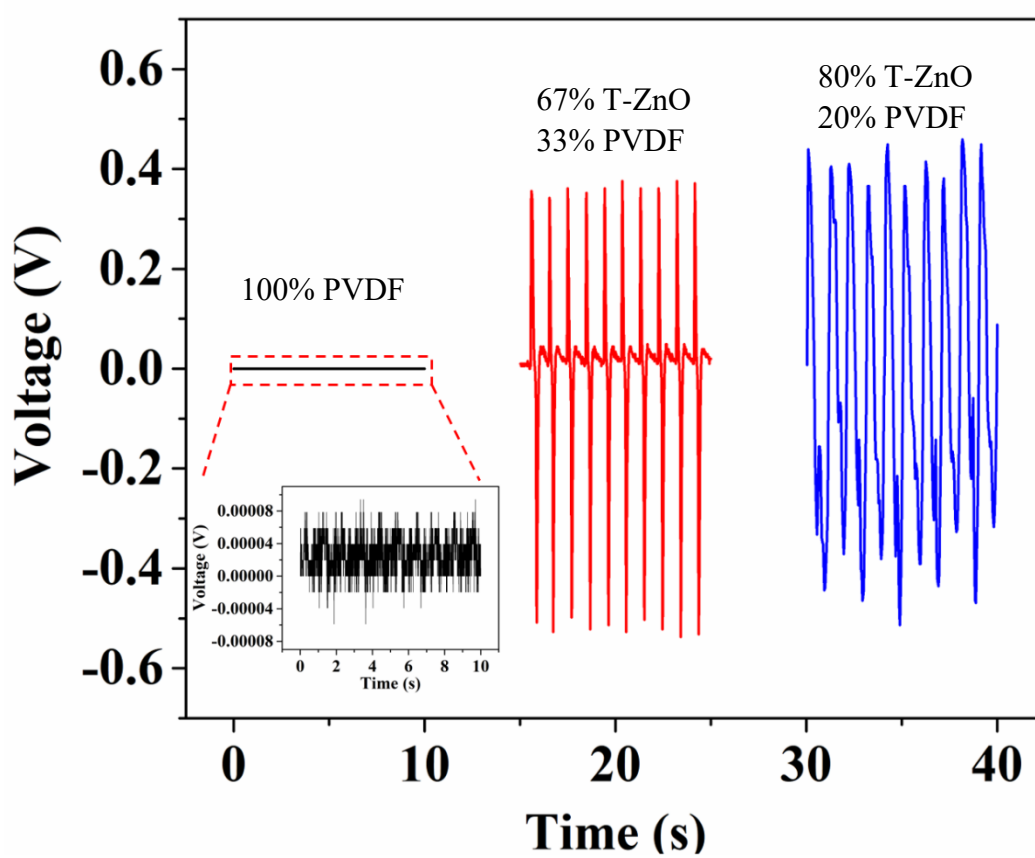

Figure S3. The outputting piezoelectric voltage of different mass fraction of T-ZnO.
